# Supplementary material for: Drug-Nutraceutical Co-Crystal and Salts for Making New and Improved Bi-Functional Analgesics
Source: PubMed Central journal article supplement (PMC7761172; doi:10.3390/pharmaceutics12121144), 2020-11-26
Supplement: pharmaceutics-12-01144-s001.pdf [file pharmaceutics-12-01144-s001.pdf]

Article

# Supplementary Materials: Drug-Nutraceutical Co-Crystal and Salts for Making New and Improved Bi-Functional Analgesics

Oli Abate Fulas, André Laferrière, Ghada Ayoub, Dayaker Gandrath, Cristina Mottillo, Hatem M. Titi, Robin S. Stein, Tomislav Friščić and Terence J. Coderre

## TABLE OF CONTENTS

|                                                                                                        |     |
|--------------------------------------------------------------------------------------------------------|-----|
| 1. SUPPLEMENTARY METHODS .....                                                                         | 3   |
| 1.1 <sup>15</sup> N Solid State Nuclear Magnetic Resonance Spectroscopy (ssNMR).....                   | 3   |
| 2. SUPPLEMENTARY DATA.....                                                                             | 4   |
| 2.1 Thermogravimetric Analysis.....                                                                    | 4   |
| 2.1.1 Thermogravimetric analysis of (pentx)(Hpca) .....                                                | 4   |
| 2.1.2 Thermogravimetric analysis of ethanol solvated (Hclon <sup>+</sup> )(ala).....                   | 5   |
| 2.1.3 Thermogravimetric analysis of (Hlin <sup>+</sup> )(cafa) .....                                   | 6   |
| 2.2 Differential scanning calorimetry .....                                                            | 7   |
| 2.2.1 Differential scanning calorimetry of (pentx)(Hpca) .....                                         | 7   |
| 2.2.2 Differential scanning calorimetry of ethanol solvated (Hclon <sup>+</sup> )(ala).....            | 7   |
| 2.2.3 Differential scanning calorimetry of (Hlin <sup>+</sup> )(cafa).....                             | 8   |
| 2.3 <sup>15</sup> N Solid State Nuclear Magnetic Resonance Spectroscopy (ssNMR) of (pentx)(Hpca) ..... | 8   |
| 2.4 <sup>1</sup> H Nuclear Magnetic Resonance Spectroscopy (NMR) of clon .....                         | 9   |
| 2.5 FTIR-ATR spectra.....                                                                              | 9   |
| 2.6 Crystal data and refinement details.....                                                           | 101 |

## 1. Supplementary Methods

### <sup>15</sup>N Solid State Nuclear Magnetic Resonance Spectroscopy (ssNMR).

<sup>15</sup>N ssNMR on was performed using a Varian 400 MHz VNMRS wide bore spectrometer operating at a <sup>15</sup>N frequency of 40.51 MHz. <sup>15</sup>N CPMAS spectra were acquired using a 7.5 mm double-resonance probe. Both **pentx** and the (pentx)(Hpca)co-crystal spectra were acquired under spinning at 5 kHz using a recycle delay of 20 s and contact time of 4 ms and 2560 scans were acquired of **pentx** and 1024 scans were acquired of the co-crystal. <sup>15</sup>N spectra were referenced using glycine at 33.4 ppm.

## 2. Supplementary Data

### 2.1. Thermogravimetric Analysis

#### 2.1.1. Thermogravimetric analysis of (pentx)(Hpca)

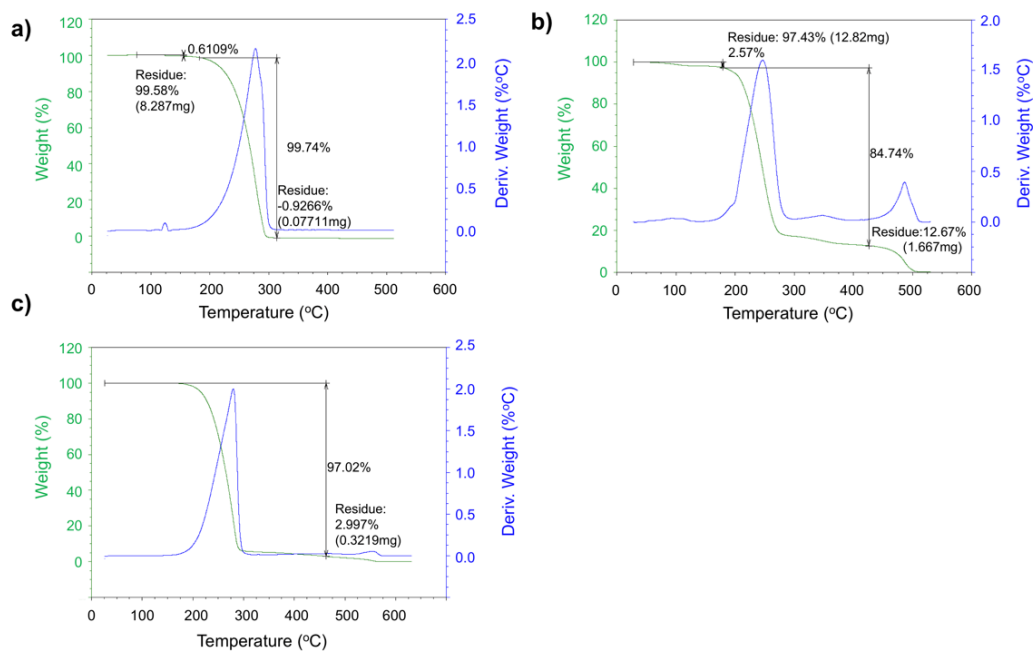

Figure S1. TGA thermogram for **pentx** (a), **Hpca** (b) and **(pentx)(Hpca)** (c).

#### 2.1.2. Thermogravimetric analysis of ethanol solvated (Hclon<sup>+</sup>)(ala)

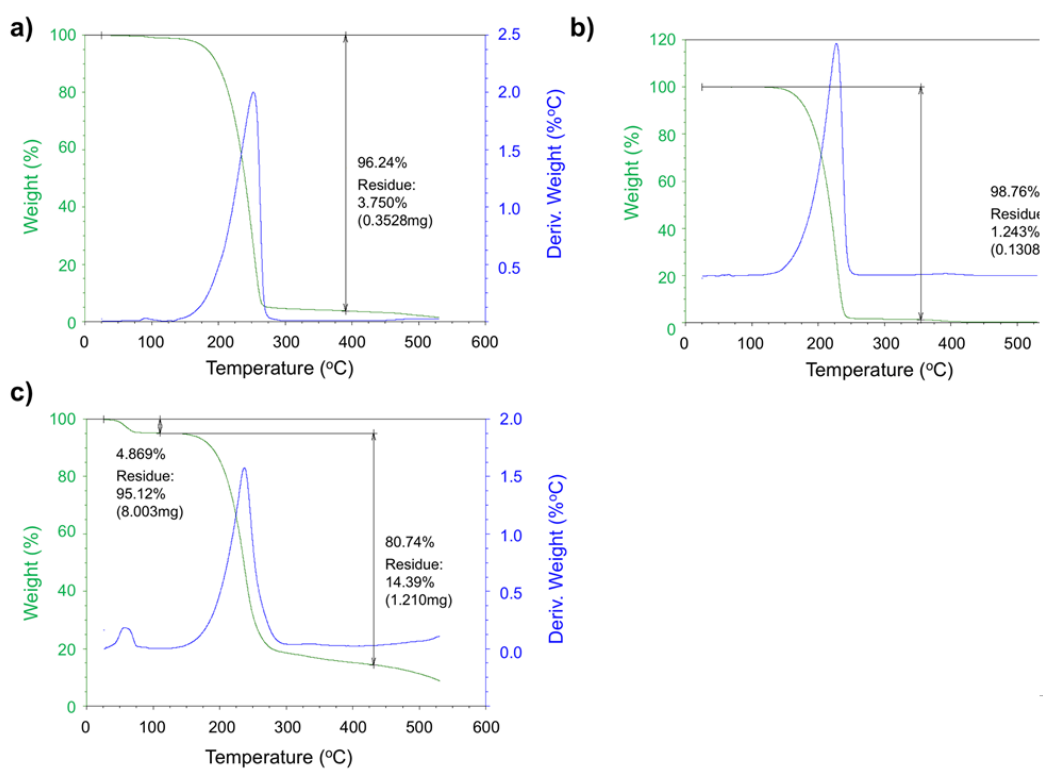

Figure S2. TGA thermogram for **clon** (a), **Hala** (b) and ethanol solvated **(Hclon<sup>+</sup>)(ala)** (c).

2.1.3. Thermogravimetric analysis of (Hlin<sup>+</sup>)(cafa<sup>-</sup>)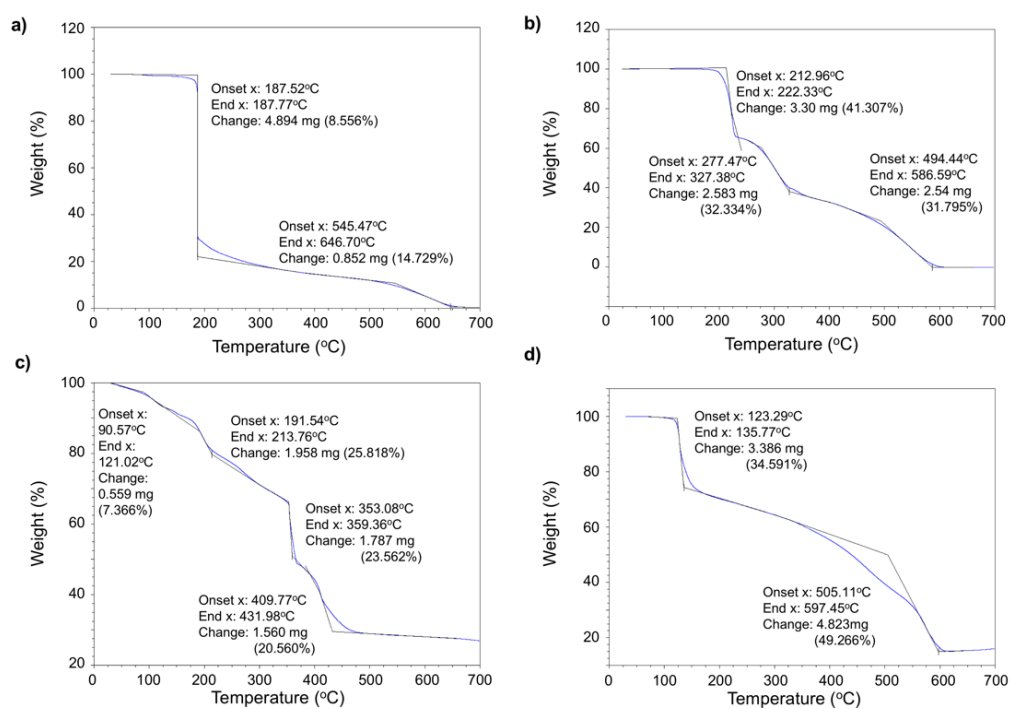Figure S3. TGA thermogram for (Hlin<sup>+</sup>Cl<sup>-</sup>) (a), Hcafa (b) (Na<sup>+</sup>cafa<sup>-</sup>) (c) and (Hlin<sup>+</sup>)(cafa<sup>-</sup>) (d).

## 2.2. Differential scanning calorimetry

## 2.2.1. Differential scanning calorimetry of (pentx)(Hpca)

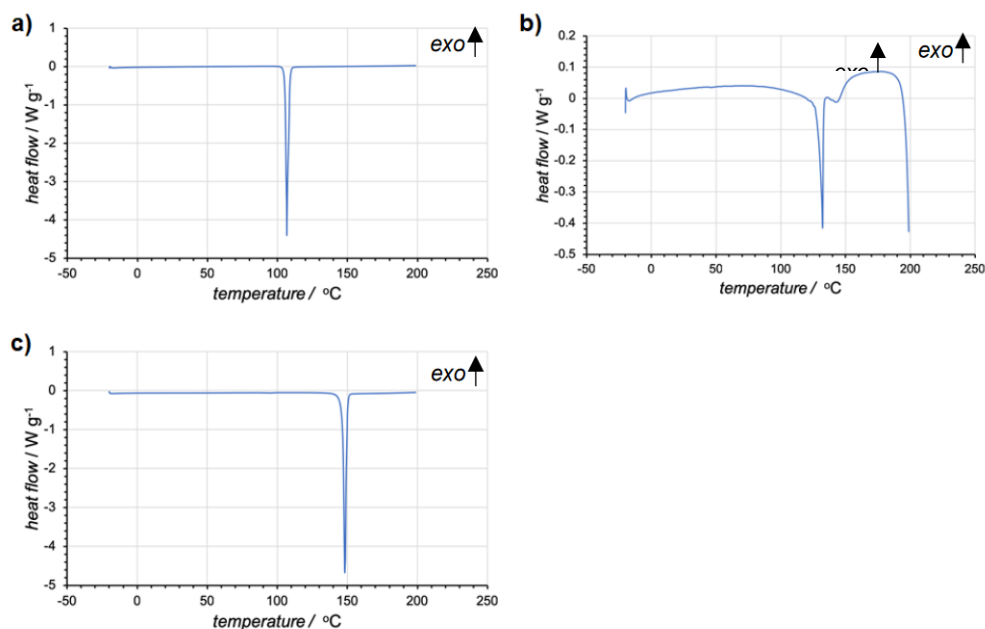

Figure S4. DSC thermogram for pentx (a), Hpca (b) and (pentx)(Hpca) (c).

2.2.2. Differential scanning calorimetry of ethanol solvated (Hclon<sup>+</sup>)(ala<sup>-</sup>)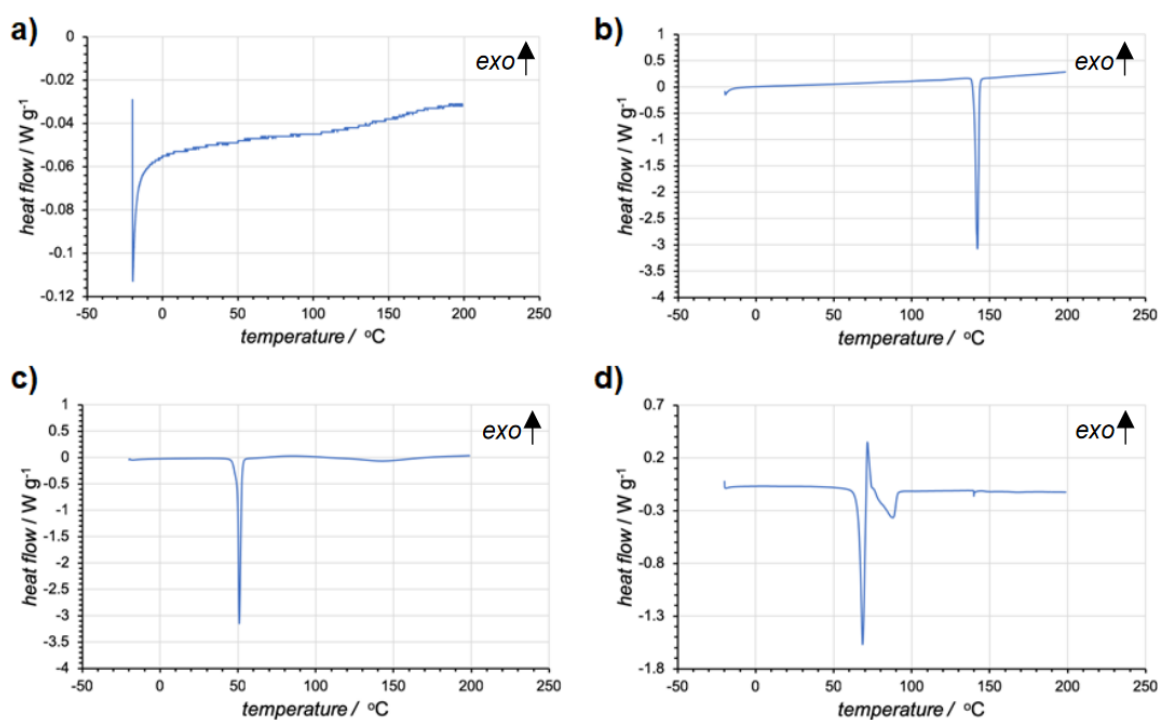

Figure S5. DSC thermogram for  $(\text{Hclon}^+\text{Cl}^-)$  (a),  $\text{clon}$  (b),  $\text{Hala}$  (c) and ethanol-solvated  $(\text{Hclon}^+)(\text{ala}^-)$  (d).

2.2.3. Differential scanning calorimetry of  $(\text{Hlin}^+)(\text{cafa}^-)$ 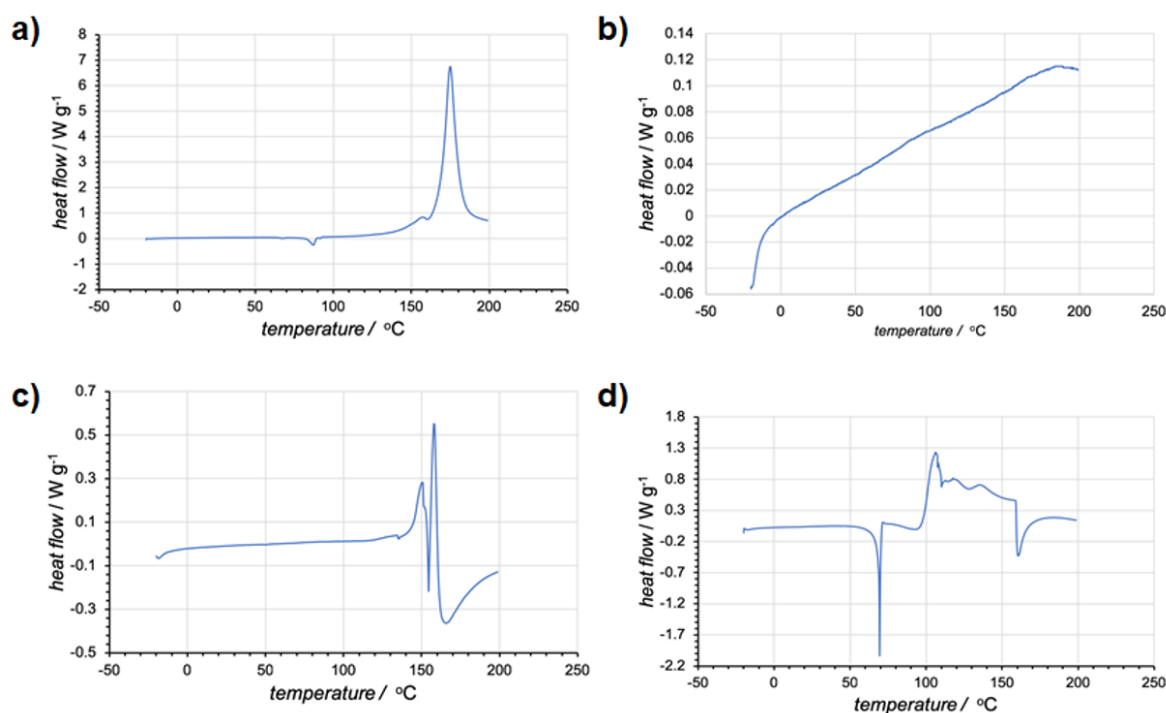

Figure S6. DSC thermogram of  $(\text{Hlin}^+\text{Cl}^-)$  (a),  $\text{Hcafa}$  (b),  $(\text{Na}^+\text{cafa}^-)$  (c) and  $(\text{Hlin}^+)(\text{cafa}^-)$  (d).

### 2.3 $^{15}\text{N}$ Solid State Nuclear Magnetic Resonance Spectroscopy (ssNMR) of (pentx)(Hpca)

The largest chemical shift change is at the C=N site of **pentx** (217.7 ppm in the component and 230.3 ppm in the complex), which is the site that interacts most strongly with the **Hpca**, congruent to what is observed in the crystal structure.

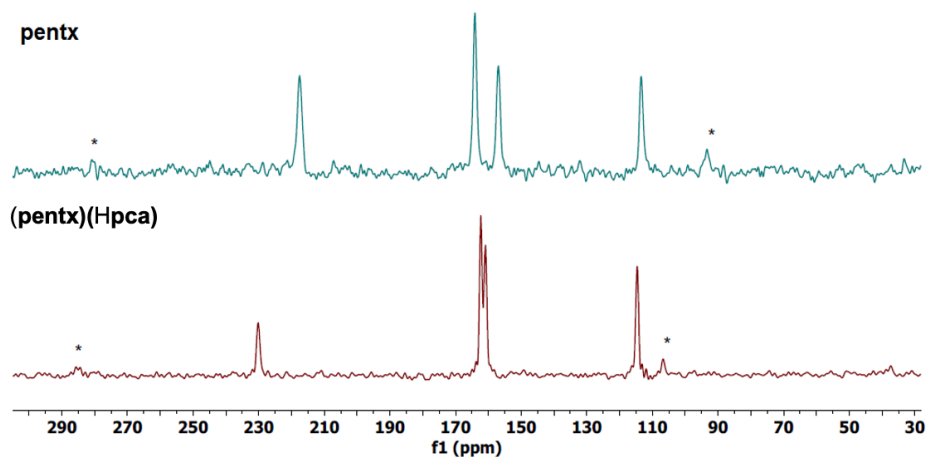

**Figure S7.**  $^{15}\text{N}$  ssNMR of **pentx** and **(pentx)(Hpca)**. Spinning sidebands are indicated by \*.

### 2.4 $^1\text{H}$ Nuclear Magnetic Resonance Spectroscopy (NMR) of clon

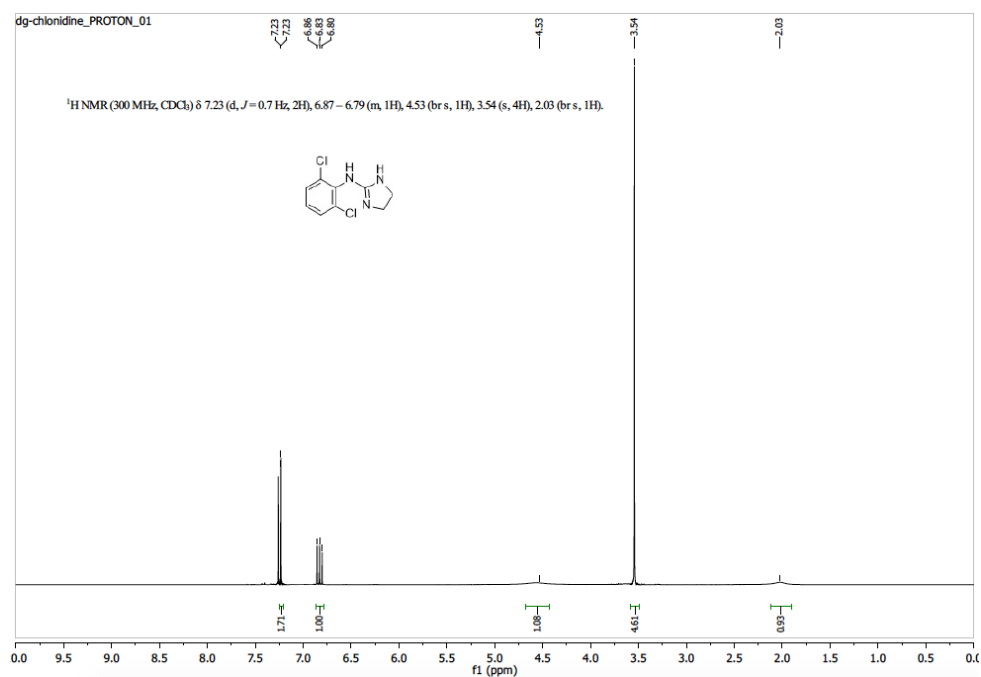

**Figure S8.**  $^1\text{H}$  NMR spectrum (300 MHz) of **clon** after reaction with KOH.

## 2.5. FTIR-ATR spectra

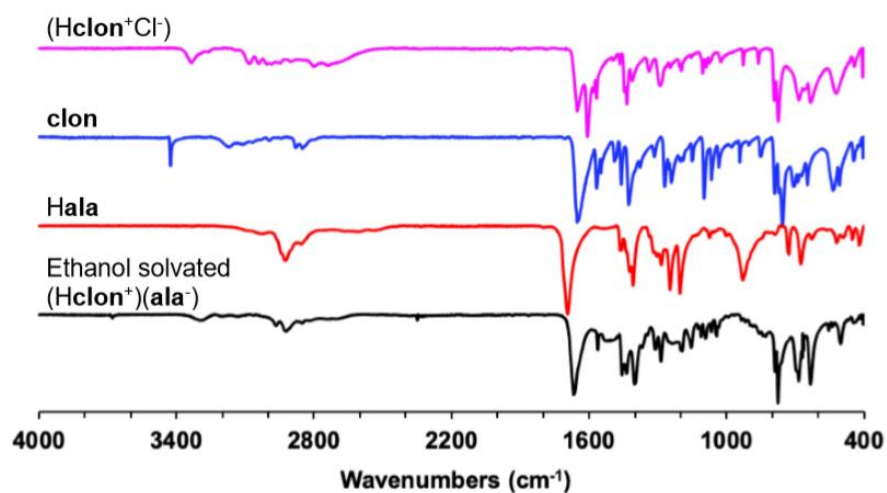

Figure S9. FTIR-ATR spectra for (Hclon<sup>+</sup>Cl<sup>-</sup>), clon, Hala and ethanol solvated (Hclon<sup>+</sup>)(ala<sup>-</sup>).

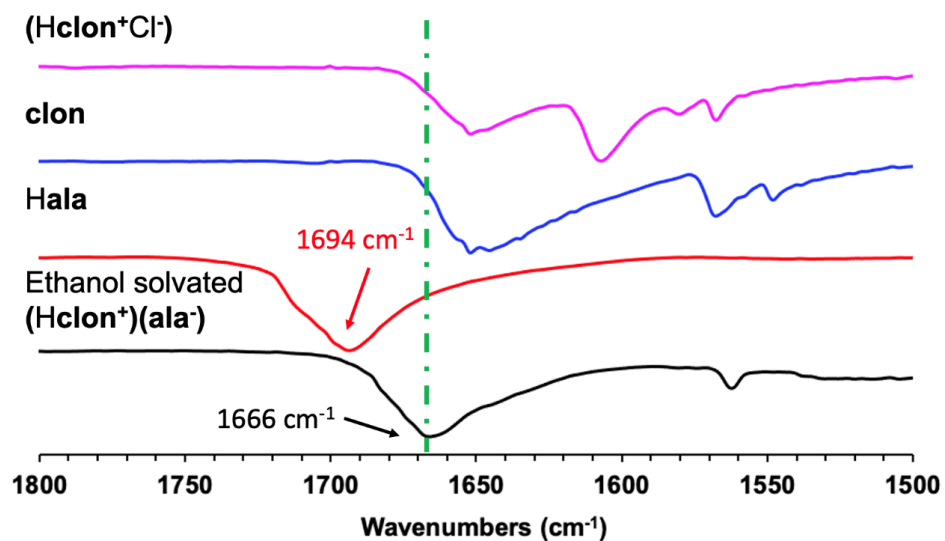

Figure S10. Selected region of FTIR-ATR spectra for (Hclon<sup>+</sup>Cl<sup>-</sup>), clon, Hala and ethanol solvated (Hclon<sup>+</sup>)(ala<sup>-</sup>).

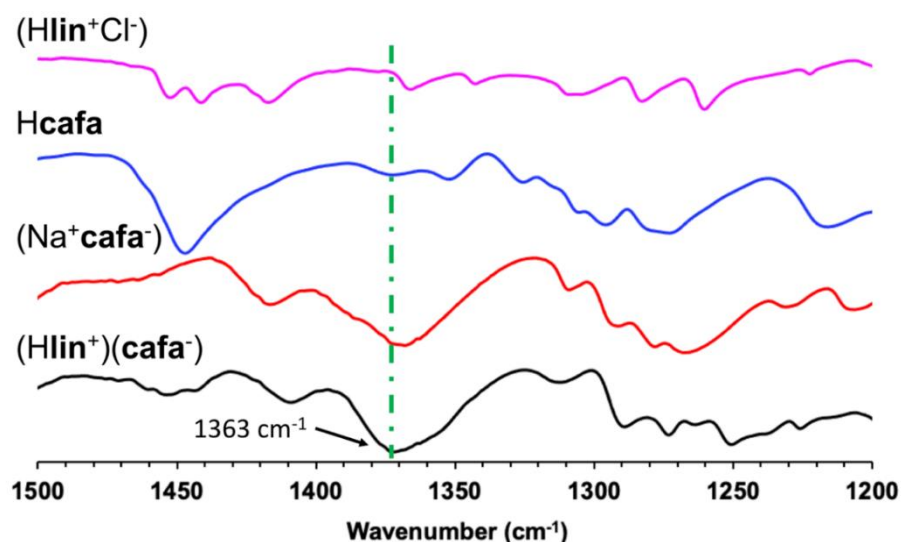

Figure S11. Selected region of FTIR-ATR spectra for (Hlin<sup>+</sup>Cl<sup>-</sup>), Hcafa, (Na<sup>+</sup>cafa<sup>-</sup>) and (Hlin<sup>+</sup>)(cafa<sup>-</sup>).

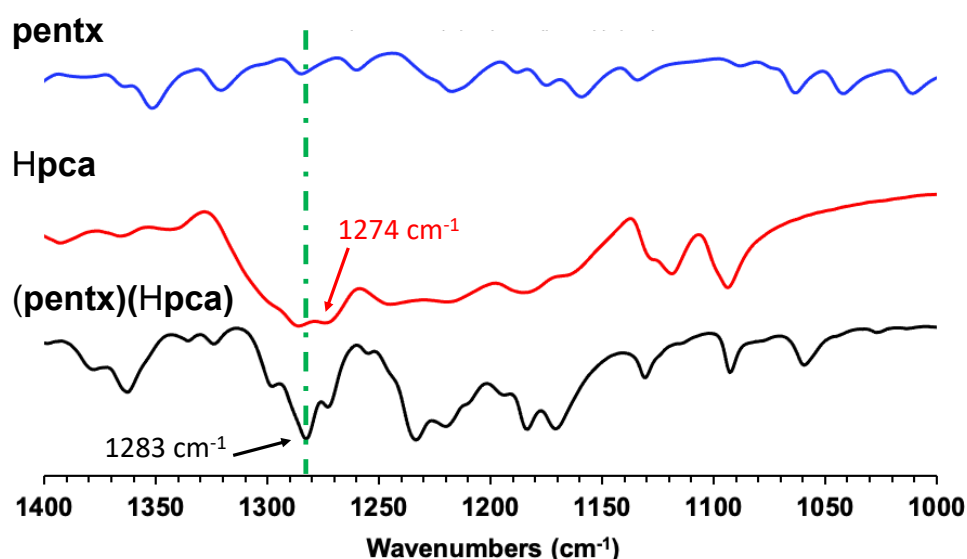

Figure S12. Selected region of FTIR-ATR spectra for (pentx), Hpca and (pentx)(Hpca).

## 2.6. Crystal data and refinement details

### 2.6.1. Crystal packing for (pentx)(Hpca)

The crystal packing of (pentx)(Hpca) reveals a range of hydrogen bonding interactions. The carboxylic acid group of Hpca forms a hydrogen bond to the nitrogen atom N12 of pentx, while the hydroxyl moieties of Hpca form O-H $\cdots$ O<sub>carbonyl</sub> interactions with the carbonyl groups of pentx. These hydrogen bonds give rise to a ladder-like one-dimensional (1D) chain along the crystallographic *b*-axis, as shown in Figure S13. The 1D hydrogen-bonded chains are connected through C-H $\cdots$ O<sub>carbonyl</sub> hydrogen-bonding contacts and, additionally, the molecules also form  $\pi\cdots\pi$  stacking motifs along the crystallographic *a*-axis, with a repeat distance of 3.30 Å.

The starting material Hpca (CSD code WUYNUA) crystallizes in triclinic *P*-1 space group and exhibits three different independent molecules in the asymmetric unit. Two crystallographically distinct sets of Hpca molecules form 2-dimensional (2D) sheets through p $\cdots$ p stacks and hydrogen-bonding motifs between the hydroxyl and carboxylic acid functionalities. Each of these sheets is hydrogen-bonded to a different type of 2D layers, which is formed by the third crystallographically

distinct set of Hpca molecules (Figure S14a). The molecules in these two alternating sets of 2D layers are mutually perpendicular.

The starting material **pentx** is known to form two polymorphs [CSD codes JAKGEH (triclinic  $P-1$ ) and JAKGEH01 (monoclinic  $P2_1/c$ )], in which the alkyl chain of the molecule adopts different orientations. Both structures display weak C-H $\cdots$ O hydrogen bonding and p $\cdots$ p stacking. The crystal packing in the structures with CSD codes JAKGEH and JAKGEH01 reveals hydrophobic regions propagating along the crystallographic  $a$ -axis and in the (110) set of crystallographic planes, respectively.

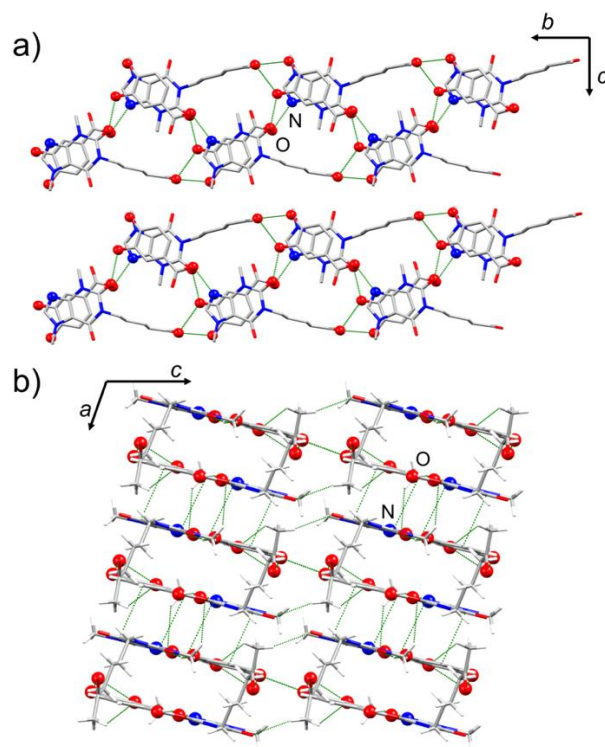

**Figure S13.** Crystal packing for the cocrystal (**pentx**)(Hpca) viewed a long: a) the crystallographic  $a$ -axis and b) along the crystallographic  $b$ -axis (b). Hydrogen atoms in a) have been omitted for clarity.



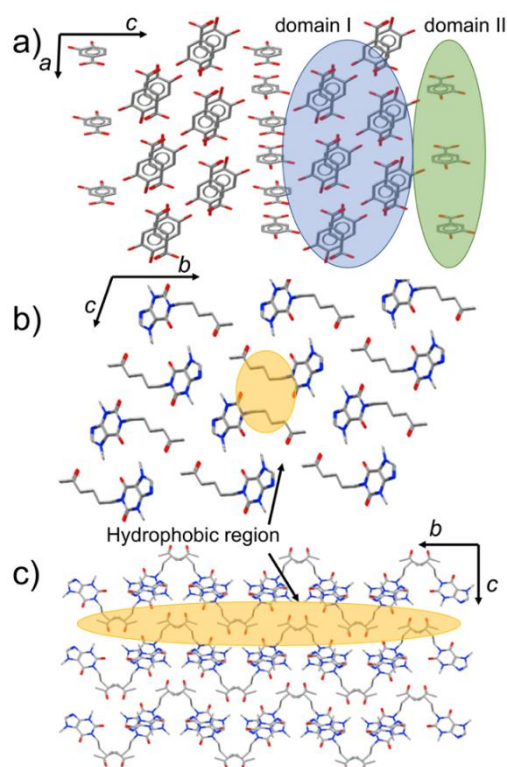

**Figure S14.** Crystal structures of solid **Hpca** (CSD code WUYNUA) and the two polymorphs of solid pent (CSD codes JAKGEH and JAKGEH01): a) layers in the structure of **Hpca** viewed along the crystallographic *b*-axis; b) structure with the CSD code JAKGEH viewed along the crystallographic *a*-axis; and c) structure with the CSD code JAKGEH01 viewed along the crystallographic *a*-axis.

### 2.6.2. Crystal packing for (Hclon<sup>+</sup>)(ala<sup>-</sup>)

The crystal packing of (Hclon<sup>+</sup>)(ala<sup>-</sup>) can be described through two domains of Hclon<sup>+</sup> and ala<sup>-</sup> molecular ions stacked along the crystallographic *b*-axis. These ions are held together by short hydrogen bonds involving the carboxylate and 4,5-dihydroimidazolium functionalities to form 1D hydrogen-bonded sheets (Figure S15). In addition, the ala<sup>-</sup> ions are involved in weaker C-H...O hydrogen bonds and van der Waals interactions between these 1D hydrogen-bonded polymers. In comparison, the structure of solid **clon** (CSD code MUFBUK) exhibits two crystallographically non-equivalent molecules in the asymmetric unit and adopts the monoclinic space group *P2<sub>1</sub>/c* (Figure S16a and b). In the structure, the **clon** molecules are engaged through a series of hydrogen bonding interactions between the 4,5-dihydroimidazole units (hydrogen bond distance of 2.98 Å) to form dimers. These hydrogen bonded dimers further interact through Type I Cl...Cl interactions (slightly shorter than the sum of vdW radii, 3.40 Å) to form 1D supramolecular chains. The crystal structure of pure solid **Hala** (CSD code THOCAR01) exhibits one molecule in the asymmetric unit, and adopts the monoclinic *P2<sub>1</sub>/c* space group. The molecules in this structure are interacting through hydrogen bonds between the carboxylic acid moieties to form R<sub>2</sub><sup>2</sup>(8) dimer motifs, as well as through C-H...S hydrogen bonds (Figure S16c and d).

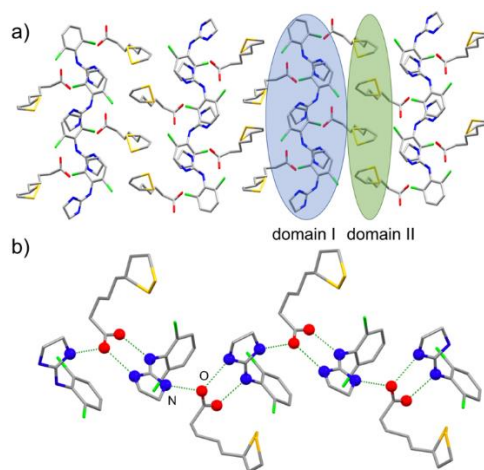

**Figure S15.** Crystal packing for the cocrystal (Hclon<sup>+</sup>)(ala<sup>-</sup>) through *b*-axis (a) and illustration of the 1D hydrogen bonding chains (b). Note that hydrogen atoms were omitted for clarity.

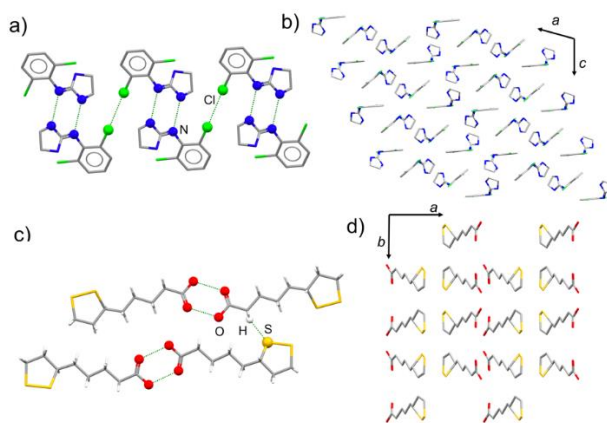

**Figure S16.** Crystal structure of **clon** (CSD code MUFBUK): a) hydrogen bonding and Cl...Cl interactions and b) view of the crystal packing along the crystallographic *b*-axis. Crystal structure of **Hala** (CSD code THOCAR01): c) hydrogen bonding motifs and d) crystal packing viewed along the crystallographic *c*-axis. Hydrogen atoms in some figures were omitted for clarity.

| <b>Table S1. Crystal data and structure refinement for (pentx)(Hpca) and (Hclon<sup>+</sup>)(ala<sup>-</sup>)</b> |                                                               |                                                                                              |
|-------------------------------------------------------------------------------------------------------------------|---------------------------------------------------------------|----------------------------------------------------------------------------------------------|
| <b>Identification code</b>                                                                                        | <b>(pentx)(Hpca)</b>                                          | <b>(Hclon<sup>+</sup>)(ala<sup>-</sup>)</b>                                                  |
| Empirical formula                                                                                                 | C <sub>20</sub> H <sub>24</sub> N <sub>4</sub> O <sub>7</sub> | C <sub>17</sub> H <sub>23</sub> Cl <sub>2</sub> N <sub>3</sub> O <sub>2</sub> S <sub>2</sub> |
| Formula weight                                                                                                    | 432.43                                                        | 436.40                                                                                       |
| Temperature/K                                                                                                     | 298(2)                                                        | 273(2)                                                                                       |
| Crystal system                                                                                                    | monoclinic                                                    | monoclinic                                                                                   |
| Space group                                                                                                       | <i>P</i> 2 <sub>1</sub>                                       | <i>P</i> 2 <sub>1</sub>                                                                      |
| <i>a</i> /Å                                                                                                       | 6.8500(4)                                                     | 9.5272(7)                                                                                    |
| <i>b</i> /Å                                                                                                       | 12.5837(6)                                                    | 8.8398(6)                                                                                    |
| <i>c</i> /Å                                                                                                       | 12.1661(6)                                                    | 24.4933(17)                                                                                  |
| $\alpha$ /°                                                                                                       | 90                                                            | 90                                                                                           |
| $\beta$ /°                                                                                                        | 100.225(4)                                                    | 92.065(4)                                                                                    |
| $\gamma$ /°                                                                                                       | 90                                                            | 90                                                                                           |
| Volume/Å <sup>3</sup>                                                                                             | 1032.04(9)                                                    | 2061.5(3)                                                                                    |
| <i>Z</i>                                                                                                          | 2                                                             | 4                                                                                            |
| $\rho_{\text{calc}}$ /cm <sup>3</sup>                                                                             | 1.392                                                         | 1.406                                                                                        |
| $\mu$ /mm <sup>-1</sup>                                                                                           | 0.898                                                         | 4.868                                                                                        |
| F(000)                                                                                                            | 456.0                                                         | 912.0                                                                                        |
| Radiation                                                                                                         | CuK $\alpha$ ( $\lambda$ = 1.54178)                           | CuK $\alpha$ ( $\lambda$ = 1.54178)                                                          |
| 2 $\theta$ range for data collection/°                                                                            | 7.384 to 139.312                                              | 7.222 to 120.364                                                                             |
| Reflections collected                                                                                             | 3580                                                          | 19058                                                                                        |
| Independent reflections                                                                                           | 3580 [R <sub>int</sub> = 0.1808, R <sub>sigma</sub> = 0.0478] | 6053 [R <sub>int</sub> = 0.0706, R <sub>sigma</sub> = 0.0808]                                |
| Data/restraints/parameters                                                                                        | 3580/1/287                                                    | 6053/374/470                                                                                 |
| Goodness-of-fit on F <sup>2</sup>                                                                                 | 1.054                                                         | 1.051                                                                                        |
| Final R indexes [I >= 2 $\sigma$ (I)]                                                                             | R <sub>1</sub> = 0.0476, wR <sub>2</sub> = 0.1101             | R <sub>1</sub> = 0.0623, wR <sub>2</sub> = 0.1468                                            |
| Final R indexes [all data]                                                                                        | R <sub>1</sub> = 0.0656, wR <sub>2</sub> = 0.1210             | R <sub>1</sub> = 0.0900, wR <sub>2</sub> = 0.1580                                            |
| Largest diff. peak/hole / e Å <sup>-3</sup>                                                                       | 0.22/-0.24                                                    | 0.61/-0.35                                                                                   |
| Flack parameter                                                                                                   | 0.61(19)                                                      | 0.04(3)                                                                                      |

**Table S2. Fractional Atomic Coordinates ( $\times 10^4$ ) and Equivalent Isotropic Displacement Parameters ( $\text{\AA}^2 \times 10^3$ ) for (pentx)(HpcA).  $U_{eq}$  is defined as 1/3 of the trace of the orthogonalised  $U_{ij}$  tensor**

| Atom | x        | y        | z       | U(eq)    |
|------|----------|----------|---------|----------|
| O1   | 2612(8)  | 7192(3)  | 5607(3) | 53.7(12) |
| C2   | 2544(9)  | 8213(5)  | 5304(5) | 41.6(15) |
| O3   | 2171(7)  | 8493(3)  | 4336(3) | 60.3(12) |
| C4   | 2975(8)  | 8946(4)  | 6264(5) | 34.7(14) |
| C5   | 2972(9)  | 10035(4) | 6040(5) | 36.0(14) |
| C6   | 3388(8)  | 10745(4) | 6912(5) | 37.2(13) |
| C7   | 3842(8)  | 10393(5) | 8008(4) | 37.6(14) |
| C8   | 3796(9)  | 9312(4)  | 8224(5) | 40.3(15) |
| C9   | 3360(8)  | 8593(5)  | 7355(5) | 39.0(13) |
| O10  | 3415(8)  | 11822(3) | 6765(3) | 52.7(11) |
| O11  | 4294(7)  | 11072(3) | 8886(3) | 53.1(12) |
| N12  | 1994(7)  | 5931(4)  | 3783(4) | 40.6(12) |
| C13  | 1620(9)  | 6388(5)  | 2789(5) | 43.7(15) |
| N14  | 1217(7)  | 5706(4)  | 1942(4) | 39.0(12) |
| C15  | 1341(8)  | 4694(5)  | 2427(4) | 34.8(13) |
| C16  | 1837(8)  | 4876(4)  | 3544(4) | 33.5(13) |
| C17  | 737(10)  | 5965(6)  | 751(5)  | 57.3(18) |
| N18  | 2132(7)  | 4069(3)  | 4300(4) | 37.6(12) |
| C19  | 1976(8)  | 3042(5)  | 3939(5) | 37.3(14) |
| N20  | 1398(6)  | 2875(3)  | 2796(4) | 36.2(11) |
| C21  | 1088(8)  | 3665(5)  | 1965(5) | 36.9(13) |
| C22  | 2690(10) | 4285(5)  | 5500(4) | 51.3(17) |
| O23  | 2308(7)  | 2287(3)  | 4574(3) | 51.8(12) |
| O24  | 638(6)   | 3436(3)  | 974(3)  | 54.5(12) |
| C25  | 1248(9)  | 1753(4)  | 2426(5) | 44.8(16) |
| C26  | 3224(8)  | 1391(5)  | 2170(5) | 47.8(15) |
| C27  | 3350(8)  | 219(4)   | 1893(5) | 44.6(15) |
| C28  | 5427(10) | -19(4)   | 1650(6) | 48.4(17) |
| C29  | 5861(11) | -1158(5) | 1459(5) | 51.7(18) |
| O30  | 4563(7)  | -1832(3) | 1314(4) | 64.0(13) |
| C31  | 8013(10) | -1441(6) | 1456(6) | 69(2)    |

**Table S3. Anisotropic Displacement Parameters ( $\text{\AA}^2 \times 10^3$ ) for (pentx)(HPCA). The Anisotropic displacement factor exponent takes the form:  $-2\pi^2[h^2a^*2U_{11}+2hka^*b^*U_{12}+\dots]$**

| Atom | $U_{11}$ | $U_{22}$ | $U_{33}$ | $U_{23}$ | $U_{13}$ | $U_{12}$ |
|------|----------|----------|----------|----------|----------|----------|
| O1   | 77(3)    | 34(2)    | 47(2)    | -7(2)    | 3(3)     | 3(2)     |
| C2   | 45(3)    | 30(3)    | 51(4)    | -7(3)    | 13(3)    | -3(3)    |
| O3   | 94(3)    | 45(3)    | 41(3)    | -5(2)    | 11(3)    | -2(3)    |
| C4   | 38(3)    | 29(3)    | 38(3)    | -3(2)    | 9(3)     | 0(3)     |
| C5   | 40(3)    | 36(3)    | 32(3)    | 0(2)     | 6(3)     | 2(3)     |
| C6   | 45(3)    | 25(3)    | 41(3)    | 0(3)     | 8(3)     | -1(3)    |
| C7   | 43(3)    | 39(3)    | 33(3)    | -5(3)    | 9(3)     | -1(3)    |
| C8   | 48(4)    | 33(3)    | 38(3)    | 6(3)     | 3(3)     | -2(3)    |
| C9   | 40(3)    | 26(3)    | 49(4)    | 1(3)     | 3(3)     | 1(3)     |
| O10  | 84(3)    | 31(3)    | 41(2)    | 0.8(19)  | 7(3)     | -1(2)    |
| O11  | 81(3)    | 37(2)    | 40(3)    | -1.5(19) | 7(2)     | -10(2)   |
| N12  | 43(3)    | 32(3)    | 45(3)    | -4(2)    | 4(2)     | 3(2)     |
| C13  | 49(4)    | 32(3)    | 49(4)    | -2(3)    | 7(3)     | 8(3)     |
| N14  | 46(3)    | 39(3)    | 31(3)    | 4(2)     | 5(2)     | 9(3)     |
| C15  | 37(3)    | 35(3)    | 32(3)    | 3(3)     | 6(2)     | 4(3)     |
| C16  | 35(3)    | 30(3)    | 35(3)    | -2(3)    | 4(3)     | 4(3)     |
| C17  | 76(5)    | 61(5)    | 34(3)    | 12(3)    | 7(3)     | 12(4)    |
| N18  | 46(3)    | 33(3)    | 32(3)    | -3(2)    | 3(2)     | 0(2)     |
| C19  | 42(3)    | 33(3)    | 37(3)    | -8(3)    | 7(3)     | 3(3)     |
| N20  | 42(3)    | 28(3)    | 38(3)    | -4(2)    | 6(2)     | 1(2)     |
| C21  | 40(3)    | 33(3)    | 37(3)    | -6(3)    | 5(3)     | 5(3)     |
| C22  | 74(5)    | 49(4)    | 28(3)    | -7(3)    | 2(3)     | 0(4)     |
| O23  | 79(3)    | 34(2)    | 41(3)    | 3(2)     | 6(2)     | 1(2)     |
| O24  | 76(3)    | 50(3)    | 34(2)    | -9(2)    | 4(2)     | 7(2)     |
| C25  | 58(4)    | 30(3)    | 45(4)    | -10(3)   | 5(3)     | 0(3)     |
| C26  | 47(3)    | 39(3)    | 58(4)    | -8(3)    | 11(3)    | 0(3)     |
| C27  | 54(4)    | 32(3)    | 45(4)    | 0(3)     | 2(3)     | 8(3)     |
| C28  | 64(4)    | 43(4)    | 40(4)    | 4(3)     | 14(3)    | 12(3)    |
| C29  | 77(5)    | 44(4)    | 36(4)    | 9(3)     | 16(3)    | 23(4)    |
| O30  | 73(3)    | 39(3)    | 74(3)    | -5(2)    | -1(3)    | 15(3)    |
| C31  | 75(5)    | 60(5)    | 81(5)    | 16(4)    | 40(4)    | 22(4)    |

**Table S4. Bond Lengths for (pentx)(Hpca)**

| Atom | Atom | Length/Å | Atom | Atom | Length/Å |
|------|------|----------|------|------|----------|
| O1   | C2   | 1.335(7) | C15  | C16  | 1.360(7) |
| C2   | O3   | 1.213(6) | C15  | C21  | 1.410(8) |
| C2   | C4   | 1.476(7) | C16  | N18  | 1.361(6) |
| C4   | C9   | 1.380(7) | N18  | C19  | 1.363(7) |
| C4   | C5   | 1.398(7) | N18  | C22  | 1.467(7) |
| C5   | C6   | 1.377(7) | C19  | O23  | 1.220(7) |
| C6   | O10  | 1.368(6) | C19  | N20  | 1.393(7) |
| C6   | C7   | 1.387(7) | N20  | C21  | 1.407(7) |
| C7   | O11  | 1.360(6) | N20  | C25  | 1.480(7) |
| C7   | C8   | 1.388(8) | C21  | O24  | 1.225(6) |
| C8   | C9   | 1.383(8) | C25  | C26  | 1.512(8) |
| N12  | C13  | 1.322(7) | C26  | C27  | 1.519(7) |
| N12  | C16  | 1.359(7) | C27  | C28  | 1.533(8) |
| C13  | N14  | 1.331(7) | C28  | C29  | 1.490(8) |
| N14  | C15  | 1.400(7) | C29  | O30  | 1.219(8) |
| N14  | C17  | 1.465(7) | C29  | C31  | 1.517(9) |

**Table S5. Bond Angles for (pentx)(Hpca)**

| Atom | Atom | Atom | Angle/°  | Atom | Atom | Atom | Angle/°  |
|------|------|------|----------|------|------|------|----------|
| O3   | C2   | O1   | 122.6(5) | N12  | C16  | C15  | 112.0(5) |
| O3   | C2   | C4   | 124.4(5) | N12  | C16  | N18  | 126.0(5) |
| O1   | C2   | C4   | 113.0(5) | C15  | C16  | N18  | 122.1(5) |
| C9   | C4   | C5   | 119.7(5) | C16  | N18  | C19  | 119.7(4) |
| C9   | C4   | C2   | 122.5(5) | C16  | N18  | C22  | 121.1(5) |
| C5   | C4   | C2   | 117.8(5) | C19  | N18  | C22  | 119.2(5) |
| C6   | C5   | C4   | 119.6(5) | O23  | C19  | N18  | 122.6(5) |
| O10  | C6   | C5   | 123.2(5) | O23  | C19  | N20  | 120.2(5) |
| O10  | C6   | C7   | 115.9(5) | N18  | C19  | N20  | 117.2(5) |
| C5   | C6   | C7   | 120.9(5) | C19  | N20  | C21  | 126.2(5) |
| O11  | C7   | C6   | 122.4(5) | C19  | N20  | C25  | 116.1(5) |
| O11  | C7   | C8   | 118.5(5) | C21  | N20  | C25  | 117.6(5) |
| C6   | C7   | C8   | 119.1(5) | O24  | C21  | N20  | 121.4(5) |
| C9   | C8   | C7   | 120.4(5) | O24  | C21  | C15  | 126.9(6) |
| C4   | C9   | C8   | 120.3(6) | N20  | C21  | C15  | 111.7(5) |
| C13  | N12  | C16  | 103.5(5) | N20  | C25  | C26  | 109.5(4) |
| N12  | C13  | N14  | 114.0(5) | C25  | C26  | C27  | 115.2(5) |
| C13  | N14  | C15  | 105.7(5) | C26  | C27  | C28  | 108.9(5) |
| C13  | N14  | C17  | 127.0(5) | C29  | C28  | C27  | 115.9(5) |
| C15  | N14  | C17  | 127.3(5) | O30  | C29  | C28  | 122.1(6) |
| C16  | C15  | N14  | 104.7(5) | O30  | C29  | C31  | 121.4(6) |
| C16  | C15  | C21  | 123.0(5) | C28  | C29  | C31  | 116.6(7) |
| N14  | C15  | C21  | 132.3(5) |      |      |      |          |

**Table S6. Hydrogen Bonds for (pentx)(Hpca)**

| D   | H    | A                | d(D-H)/Å | d(H-A)/Å | d(D-A)/Å | D-H-A/° |
|-----|------|------------------|----------|----------|----------|---------|
| O1  | H1   | N12              | 0.82     | 1.92     | 2.700(6) | 158.9   |
| O10 | H10  | O23 <sup>1</sup> | 0.82     | 1.88     | 2.703(6) | 179.6   |
| O11 | H11  | O10              | 0.82     | 2.29     | 2.714(5) | 113.1   |
| O11 | H11  | O30 <sup>2</sup> | 0.82     | 2.00     | 2.773(5) | 156.6   |
| C13 | H13  | O3               | 0.93     | 2.62     | 3.233(7) | 123.9   |
| C31 | H31B | O24 <sup>3</sup> | 0.96     | 2.43     | 3.254(8) | 143.6   |
| C31 | H31C | O10 <sup>4</sup> | 0.96     | 2.63     | 3.342(8) | 131.7   |

**Table S7. Hydrogen Atom Coordinates (Å×10<sup>4</sup>) and Isotropic Displacement Parameters (Å<sup>2</sup>×10<sup>3</sup>) for (pentx)(Hpca)**

| Atom | x       | y        | z       | U(eq) |
|------|---------|----------|---------|-------|
| H1   | 2736.16 | 6819.69  | 5070.61 | 81    |
| H5   | 2692.03 | 10278.86 | 5307.73 | 43    |
| H8   | 4060.56 | 9068.79  | 8957.58 | 48    |
| H9   | 3325.77 | 7869.77  | 7507.13 | 47    |
| H10  | 3073.23 | 11962.17 | 6100.12 | 79    |
| H11  | 4411.53 | 11676.31 | 8653.49 | 80    |
| H13  | 1636.1  | 7120.48  | 2689.91 | 52    |
| H17A | 1109.46 | 6686.82  | 637.78  | 86    |
| H17B | -663.03 | 5881.01  | 494.33  | 86    |
| H17C | 1448.52 | 5496.8   | 339.93  | 86    |
| H22A | 2818.78 | 5038.13  | 5618.39 | 77    |
| H22B | 3932.61 | 3945.76  | 5783.39 | 77    |
| H22C | 1685.01 | 4013.29  | 5882.02 | 77    |
| H25A | 232.67  | 1684.26  | 1764.27 | 54    |
| H25B | 876.66  | 1310.85  | 3008.72 | 54    |
| H26A | 4244.53 | 1550.14  | 2809.55 | 57    |
| H26B | 3514.24 | 1802.61  | 1544.27 | 57    |
| H27A | 2356.56 | 44.42    | 1246.31 | 54    |
| H27B | 3101.21 | -208.62  | 2517.43 | 54    |
| H28A | 5606.95 | 382.3    | 995.03  | 58    |
| H28B | 6396.59 | 237.45   | 2273.1  | 58    |
| H31A | 8800.9  | -805.69  | 1535.5  | 103   |
| H31B | 8120.45 | -1783.83 | 764.16  | 103   |
| H31C | 8478.85 | -1913.02 | 2066.12 | 103   |

**Table S8. Fractional Atomic Coordinates ( $\times 10^4$ ) and Equivalent Isotropic Displacement Parameters ( $\text{\AA}^2 \times 10^3$ ) for (Hclon<sup>+</sup>)(ala<sup>-</sup>).  $U_{eq}$  is defined as 1/3 of the trace of the orthogonalised  $U_{ij}$  tensor.**

| Atom | x         | y         | z          | $U_{eq}$ |
|------|-----------|-----------|------------|----------|
| Cl1  | 8745(2)   | 4303(3)   | 7024.4(9)  | 54.4(6)  |
| Cl2  | 7086(3)   | 1003(3)   | 8738.0(9)  | 57.9(7)  |
| Cl3  | 3851(2)   | 9278(3)   | 7974.7(10) | 57.7(7)  |
| Cl4  | 1855(3)   | 6062(3)   | 6248.0(10) | 64.4(7)  |
| S1   | 2786(2)   | 293(3)    | 9442.4(8)  | 42.3(6)  |
| S2   | 1336(3)   | -1262(3)  | 9690.9(10) | 53.1(7)  |
| S3   | -1901(3)  | 5196(4)   | 5600.5(11) | 72.2(8)  |
| S4   | -3740(3)  | 4111(3)   | 5379.8(11) | 69.6(8)  |
| O1   | -1474(5)  | 10009(7)  | 6878(2)    | 38.0(14) |
| O2   | 629(6)    | 10160(8)  | 6529(2)    | 56.5(18) |
| O3   | 3731(5)   | 5116(7)   | 8111.4(19) | 32.0(13) |
| O4   | 5859(5)   | 5087(7)   | 8515(2)    | 41.2(14) |
| N1   | 6093(6)   | 1540(8)   | 7041(2)    | 29.6(15) |
| N2   | 4529(6)   | 3168(8)   | 7301(2)    | 29.3(15) |
| N3   | 6637(6)   | 3101(7)   | 7803(2)    | 27.1(14) |
| N4   | 1204(6)   | 6483(7)   | 7947(2)    | 27.6(15) |
| N5   | -425(6)   | 8129(8)   | 7696(2)    | 29.9(15) |
| N6   | 1589(6)   | 8086(8)   | 7197(3)    | 33.3(16) |
| C1   | 8044(7)   | 2611(9)   | 7893(3)    | 28.3(17) |
| C2   | 8385(9)   | 1716(10)  | 8340(3)    | 42(2)    |
| C3   | 9815(10)  | 1350(11)  | 8467(4)    | 51(2)    |
| C4   | 10817(10) | 1883(12)  | 8142(4)    | 57(3)    |
| C5   | 10519(8)  | 2740(11)  | 7698(4)    | 47(2)    |
| C6   | 9121(8)   | 3138(11)  | 7570(3)    | 40(2)    |
| C7   | 5816(8)   | 2618(9)   | 7389(3)    | 26.9(17) |
| C8   | 4969(7)   | 1452(10)  | 6621(3)    | 28.4(17) |
| C9   | 3781(8)   | 2317(11)  | 6880(3)    | 34.9(19) |
| C10  | 2972(8)   | 7640(9)   | 7093(3)    | 34.3(19) |
| C11  | 4138(9)   | 8175(11)  | 7418(4)    | 47(2)    |
| C12  | 5488(9)   | 7810(11)  | 7280(5)    | 56(3)    |
| C13  | 5697(11)  | 6972(13)  | 6813(5)    | 68(3)    |
| C14  | 4613(11)  | 6432(12)  | 6506(4)    | 60(3)    |
| C15  | 3233(10)  | 6757(10)  | 6642(4)    | 48(2)    |
| C16  | 833(7)    | 7557(9)   | 7606(3)    | 24.6(17) |
| C17  | -1106(8)  | 7237(11)  | 8113(3)    | 38(2)    |
| C18  | 166(8)    | 6336(10)  | 8368(3)    | 34.1(19) |
| C19  | -3251(14) | 4078(15)  | 4682(4)    | 78(3)    |
| C20  | -2750(13) | 5587(14)  | 4538(4)    | 71(3)    |
| C21  | -1948(12) | 6450(13)  | 4994(4)    | 66(3)    |
| C22  | -2553(15) | 7911(14)  | 5111(4)    | 81(4)    |
| C23  | -1508(15) | 8851(15)  | 5485(5)    | 88(4)    |
| C24  | -2212(14) | 10237(14) | 5677(5)    | 91(4)    |
| C25  | -1278(10) | 11252(11) | 6026(4)    | 49(2)    |
| C26  | -661(9)   | 10418(11) | 6517(3)    | 41(2)    |
| C27  | 1560(11)  | -692(13)  | 10399(4)   | 60(3)    |
| C28  | 1781(10)  | 1000(12)  | 10426(3)   | 49(2)    |
| C29  | 2016(9)   | 1752(10)  | 9881(3)    | 44(2)    |
| C30  | 2919(9)   | 3135(11)  | 9920(3)    | 46(2)    |
| C31  | 3066(9)   | 4045(11)  | 9398(3)    | 43(2)    |



|     |         |          |         |          |
|-----|---------|----------|---------|----------|
| C32 | 3998(8) | 5452(11) | 9471(3) | 41(2)    |
| C33 | 4078(8) | 6392(10) | 8964(3) | 36(2)    |
| C34 | 4594(8) | 5483(9)  | 8492(3) | 29.2(18) |

**Table S9. Anisotropic Displacement Parameters ( $\text{\AA}^2 \times 10^3$ ) for (Hclon<sup>+</sup>)(ala<sup>-</sup>). The Anisotropic displacement factor exponent takes the form:  $-2\pi^2[h^2a^*U_{11}+2hka^*b^*U_{12}+\dots]$ .**

| Atom | U <sub>11</sub> | U <sub>22</sub> | U <sub>33</sub> | U <sub>23</sub> | U <sub>13</sub> | U <sub>12</sub> |
|------|-----------------|-----------------|-----------------|-----------------|-----------------|-----------------|
| Cl1  | 42.6(14)        | 71.0(17)        | 50.2(14)        | 4.0(13)         | 8.2(10)         | -3.4(12)        |
| Cl2  | 74.4(17)        | 52.8(15)        | 45.4(13)        | 8.3(12)         | -11.2(12)       | -5.6(13)        |
| Cl3  | 45.5(14)        | 63.4(16)        | 63.0(15)        | 6.9(13)         | -13.9(11)       | -2.9(12)        |
| Cl4  | 82.6(18)        | 60.0(16)        | 51.3(14)        | -3.7(13)        | 11.0(12)        | 0.9(14)         |
| S1   | 39.2(12)        | 52.4(14)        | 35.2(11)        | -4.0(11)        | 1.4(9)          | 10.8(11)        |
| S2   | 49.8(15)        | 53.2(16)        | 56.1(15)        | -10.5(12)       | -0.6(12)        | -2.3(11)        |
| S3   | 81(2)           | 80(2)           | 53.9(15)        | 17.0(16)        | -12.5(14)       | 7.9(17)         |
| S4   | 81(2)           | 72(2)           | 55.3(16)        | 6.3(15)         | 4.2(14)         | 9.2(16)         |
| O1   | 25(3)           | 46(4)           | 43(3)           | 2(3)            | 0(2)            | 19(3)           |
| O2   | 36(3)           | 71(5)           | 63(4)           | 21(4)           | 11(3)           | 16(3)           |
| O3   | 24(3)           | 43(3)           | 29(3)           | -1(3)           | 2(2)            | 10(3)           |
| O4   | 21(3)           | 60(4)           | 42(3)           | -11(3)          | -3(2)           | 15(3)           |
| N1   | 16(3)           | 41(4)           | 32(3)           | -5(3)           | -5(3)           | 8(3)            |
| N2   | 13(3)           | 44(4)           | 31(3)           | -3(3)           | -3(3)           | 14(3)           |
| N3   | 18(3)           | 32(4)           | 31(3)           | -7(3)           | 0(3)            | 12(3)           |
| N4   | 15(3)           | 38(4)           | 30(3)           | 1(3)            | 2(3)            | 10(3)           |
| N5   | 15(3)           | 43(4)           | 32(4)           | 4(3)            | 0(3)            | 17(3)           |
| N6   | 19(3)           | 47(4)           | 35(4)           | 13(3)           | -1(3)           | 14(3)           |
| C1   | 15(3)           | 30(5)           | 39(4)           | -9(3)           | -8(3)           | 9(3)            |
| C2   | 45(5)           | 40(5)           | 40(5)           | -5(4)           | -18(4)          | 13(4)           |
| C3   | 56(5)           | 39(6)           | 56(6)           | -11(4)          | -30(4)          | 15(5)           |
| C4   | 36(5)           | 59(7)           | 75(7)           | -25(5)          | -20(4)          | 17(5)           |
| C5   | 21(4)           | 58(6)           | 62(6)           | -27(4)          | 8(4)            | 10(4)           |
| C6   | 23(4)           | 48(6)           | 48(5)           | -14(4)          | 1(3)            | 8(4)            |
| C7   | 22(4)           | 32(5)           | 26(4)           | 3(3)            | -1(3)           | 8(3)            |
| C8   | 19(4)           | 37(5)           | 29(4)           | 3(3)            | -4(3)           | 6(3)            |
| C9   | 22(4)           | 50(5)           | 32(4)           | 2(4)            | -5(3)           | 10(4)           |
| C10  | 20(4)           | 36(5)           | 47(4)           | 20(4)           | 11(3)           | 11(3)           |
| C11  | 25(4)           | 41(5)           | 74(6)           | 25(4)           | 0(4)            | 12(4)           |
| C12  | 19(4)           | 49(6)           | 101(7)          | 41(5)           | 4(5)            | 10(4)           |
| C13  | 34(5)           | 63(7)           | 111(8)          | 47(6)           | 39(5)           | 22(5)           |
| C14  | 63(6)           | 46(6)           | 73(7)           | 23(5)           | 40(5)           | 27(5)           |
| C15  | 46(5)           | 48(6)           | 50(5)           | 16(4)           | 20(4)           | 15(4)           |
| C16  | 12(3)           | 28(5)           | 34(4)           | -2(3)           | -4(3)           | 4(3)            |
| C17  | 28(4)           | 50(5)           | 36(5)           | -4(4)           | 7(3)            | 15(4)           |
| C18  | 25(4)           | 52(6)           | 25(4)           | 2(4)            | 5(3)            | 2(4)            |
| C19  | 90(9)           | 80(8)           | 63(6)           | -19(6)          | 5(6)            | 5(6)            |
| C20  | 86(8)           | 90(8)           | 36(5)           | -3(5)           | 5(5)            | 10(6)           |
| C21  | 62(7)           | 83(7)           | 53(6)           | 10(5)           | 4(5)            | 1(5)            |
| C22  | 121(10)         | 77(7)           | 43(6)           | 11(5)           | -9(6)           | 18(7)           |
| C23  | 103(10)         | 95(9)           | 66(7)           | -6(7)           | -2(7)           | 28(7)           |
| C24  | 114(10)         | 76(8)           | 80(8)           | 3(7)            | -35(7)          | 38(7)           |
| C25  | 46(4)           | 50(5)           | 52(4)           | 6(4)            | 5(3)            | 16(4)           |
| C26  | 29(4)           | 46(6)           | 49(5)           | 2(4)            | 7(4)            | 22(4)           |

|     |       |       |       |       |       |        |
|-----|-------|-------|-------|-------|-------|--------|
| C27 | 57(6) | 72(6) | 51(5) | -7(5) | 10(5) | -23(6) |
| C28 | 46(5) | 60(5) | 43(5) | 1(4)  | 10(4) | 2(5)   |
| C29 | 41(5) | 54(5) | 36(5) | 1(4)  | -1(4) | 10(4)  |
| C30 | 46(5) | 57(6) | 36(5) | -8(4) | -1(4) | 12(4)  |
| C31 | 35(5) | 53(6) | 40(5) | -1(4) | -2(4) | 5(4)   |
| C32 | 24(4) | 55(6) | 42(4) | -3(4) | -1(4) | 16(4)  |
| C33 | 24(4) | 47(5) | 37(4) | -6(4) | -3(3) | 17(4)  |
| C34 | 25(4) | 30(5) | 33(4) | 4(3)  | 2(3)  | 10(3)  |

**Table S10. Bond Lengths for (Hclon<sup>+</sup>)(ala<sup>-</sup>).**

| Atom | Atom | Length/Å  | Atom | Atom | Length/Å  |
|------|------|-----------|------|------|-----------|
| C11  | C6   | 1.715(9)  | C1   | C6   | 1.397(12) |
| C12  | C2   | 1.722(10) | C2   | C3   | 1.423(12) |
| C13  | C11  | 1.706(10) | C3   | C4   | 1.350(14) |
| C14  | C15  | 1.715(11) | C4   | C5   | 1.349(14) |
| S1   | C29  | 1.847(9)  | C5   | C6   | 1.402(11) |
| S1   | S2   | 2.056(3)  | C8   | C9   | 1.524(11) |
| S2   | C27  | 1.811(9)  | C10  | C15  | 1.382(12) |
| S3   | C21  | 1.853(11) | C10  | C11  | 1.425(12) |
| S3   | S4   | 2.052(5)  | C11  | C12  | 1.380(12) |
| S4   | C19  | 1.789(11) | C12  | C13  | 1.382(16) |
| O1   | C26  | 1.249(10) | C13  | C14  | 1.343(16) |
| O2   | C26  | 1.250(10) | C14  | C15  | 1.398(13) |
| O3   | C34  | 1.263(9)  | C17  | C18  | 1.561(11) |
| O4   | C34  | 1.255(9)  | C19  | C20  | 1.464(17) |
| N1   | C7   | 1.311(10) | C20  | C21  | 1.535(15) |
| N1   | C8   | 1.461(9)  | C21  | C22  | 1.446(15) |
| N2   | C7   | 1.329(9)  | C22  | C23  | 1.567(18) |
| N2   | C9   | 1.443(10) | C23  | C24  | 1.481(11) |
| N3   | C7   | 1.329(9)  | C24  | C25  | 1.508(16) |
| N3   | C1   | 1.418(9)  | C25  | C26  | 1.513(12) |
| N4   | C16  | 1.306(9)  | C27  | C28  | 1.512(14) |
| N4   | C18  | 1.460(9)  | C28  | C29  | 1.516(12) |
| N5   | C16  | 1.327(9)  | C29  | C30  | 1.496(13) |
| N5   | C17  | 1.461(10) | C30  | C31  | 1.521(12) |
| N6   | C16  | 1.338(10) | C31  | C32  | 1.535(13) |
| N6   | C10  | 1.407(10) | C32  | C33  | 1.498(11) |
| C1   | C2   | 1.381(11) | C33  | C34  | 1.506(11) |

**Table S11. Bond Angles for (Hclon<sup>+</sup>)(ala<sup>-</sup>).**

| Atom | Atom | Atom | Angle/°   | Atom | Atom | Atom | Angle/°   |
|------|------|------|-----------|------|------|------|-----------|
| C29  | S1   | S2   | 90.6(3)   | C14  | C13  | C12  | 121.5(9)  |
| C27  | S2   | S1   | 92.3(3)   | C13  | C14  | C15  | 120.3(10) |
| C21  | S3   | S4   | 94.2(4)   | C10  | C15  | C14  | 120.3(10) |
| C19  | S4   | S3   | 90.6(5)   | C10  | C15  | C14  | 119.7(7)  |
| C7   | N1   | C8   | 109.7(6)  | C14  | C15  | C14  | 120.0(8)  |
| C7   | N2   | C9   | 110.7(7)  | N4   | C16  | N5   | 113.3(7)  |
| C7   | N3   | C1   | 123.1(6)  | N4   | C16  | N6   | 126.3(6)  |
| C16  | N4   | C18  | 110.0(6)  | N5   | C16  | N6   | 120.4(7)  |
| C16  | N5   | C17  | 109.7(6)  | N5   | C17  | C18  | 101.4(6)  |
| C16  | N6   | C10  | 124.8(6)  | N4   | C18  | C17  | 102.0(6)  |
| C2   | C1   | C6   | 118.9(7)  | C20  | C19  | S4   | 108.3(8)  |
| C2   | C1   | N3   | 119.5(7)  | C19  | C20  | C21  | 115.8(9)  |
| C6   | C1   | N3   | 121.3(7)  | C22  | C21  | C20  | 113.4(10) |
| C1   | C2   | C3   | 120.0(9)  | C22  | C21  | S3   | 112.0(8)  |
| C1   | C2   | C12  | 120.3(6)  | C20  | C21  | S3   | 106.5(8)  |
| C3   | C2   | C12  | 119.6(7)  | C21  | C22  | C23  | 109.9(10) |
| C4   | C3   | C2   | 118.9(9)  | C24  | C23  | C22  | 109.8(11) |
| C5   | C4   | C3   | 122.6(9)  | C23  | C24  | C25  | 114.0(10) |
| C4   | C5   | C6   | 119.4(9)  | C24  | C25  | C26  | 111.4(9)  |
| C1   | C6   | C5   | 120.1(8)  | O1   | C26  | O2   | 124.4(8)  |
| C1   | C6   | C11  | 120.3(6)  | O1   | C26  | C25  | 118.1(7)  |
| C5   | C6   | C11  | 119.6(7)  | O2   | C26  | C25  | 117.4(8)  |
| N1   | C7   | N2   | 111.5(7)  | C28  | C27  | S2   | 109.2(7)  |
| N1   | C7   | N3   | 127.0(7)  | C27  | C28  | C29  | 114.8(8)  |
| N2   | C7   | N3   | 121.3(7)  | C30  | C29  | C28  | 113.9(8)  |
| N1   | C8   | C9   | 102.4(6)  | C30  | C29  | S1   | 111.6(6)  |
| N2   | C9   | C8   | 101.8(6)  | C28  | C29  | S1   | 106.3(6)  |
| C15  | C10  | N6   | 120.0(8)  | C29  | C30  | C31  | 116.6(7)  |
| C15  | C10  | C11  | 118.4(7)  | C30  | C31  | C32  | 113.6(7)  |
| N6   | C10  | C11  | 121.4(8)  | C33  | C32  | C31  | 113.5(7)  |
| C12  | C11  | C10  | 120.0(10) | C32  | C33  | C34  | 111.6(7)  |
| C12  | C11  | C13  | 120.5(8)  | O4   | C34  | O3   | 124.1(7)  |
| C10  | C11  | C13  | 119.5(6)  | O4   | C34  | C33  | 117.0(7)  |
| C11  | C12  | C13  | 119.5(10) | O3   | C34  | C33  | 118.8(6)  |

**Table S12. Hydrogen Bonds for (Hclon<sup>+</sup>)(ala<sup>-</sup>).**

| D   | H    | A                | d(D-H)/Å | d(H-A)/Å | d(D-A)/Å  | D-H-A/° |
|-----|------|------------------|----------|----------|-----------|---------|
| N1  | H1   | O1 <sup>1</sup>  | 0.86     | 1.90     | 2.726(8)  | 161.8   |
| N2  | H2   | O3               | 0.86     | 1.95     | 2.756(8)  | 155.5   |
| N3  | H3   | O4               | 0.86     | 1.75     | 2.600(8)  | 171.8   |
| N4  | H4A  | O3               | 0.86     | 1.89     | 2.711(7)  | 160.0   |
| N5  | H5A  | O1               | 0.86     | 1.97     | 2.763(8)  | 152.6   |
| N6  | H6   | O2               | 0.86     | 1.75     | 2.602(9)  | 172.8   |
| C14 | H14  | S4 <sup>2</sup>  | 0.93     | 2.93     | 3.821(10) | 161.1   |
| C20 | H20B | O2 <sup>3</sup>  | 0.97     | 2.41     | 3.380(12) | 178.2   |
| C25 | H25A | Cl1 <sup>4</sup> | 0.97     | 2.93     | 3.640(10) | 131.2   |
| C28 | H28A | O4 <sup>5</sup>  | 0.97     | 2.64     | 3.466(11) | 143.5   |

**Table S13. Hydrogen Atom Coordinates (Å×10<sup>4</sup>) and Isotropic Displacement Parameters (Å<sup>2</sup>×10<sup>3</sup>) for (Hclon<sup>+</sup>)(ala<sup>-</sup>).**

| Atom | x        | y        | z        | U(eq) |
|------|----------|----------|----------|-------|
| H1   | 6826.2   | 971.84   | 7058.33  | 35    |
| H2   | 4188.51  | 3927.43  | 7471.28  | 35    |
| H3   | 6298.39  | 3741.15  | 8027.88  | 32    |
| H4A  | 1949.96  | 5940.8   | 7926.94  | 33    |
| H5A  | -785.61  | 8906.75  | 7533.67  | 36    |
| H6   | 1202.11  | 8746.98  | 6982.89  | 40    |
| H3A  | 10053.84 | 752.56   | 8768.95  | 61    |
| H4   | 11750.65 | 1650.38  | 8228.88  | 69    |
| H5   | 11234.69 | 3064.19  | 7477.13  | 56    |
| H8A  | 4704.64  | 410.3    | 6546.26  | 34    |
| H8B  | 5243.26  | 1928.55  | 6284.3   | 34    |
| H9A  | 3303.54  | 2979.55  | 6618.46  | 42    |
| H9B  | 3103.58  | 1634.54  | 7034.57  | 42    |
| H12  | 6250.63  | 8124.02  | 7498.51  | 68    |
| H13  | 6608.57  | 6778.49  | 6708.96  | 82    |
| H14  | 4780.88  | 5838.18  | 6201.88  | 72    |
| H17A | -1812.33 | 6564.74  | 7953.19  | 46    |
| H17B | -1533.2  | 7879.25  | 8382.12  | 46    |
| H18A | 500.92   | 6781.72  | 8710.29  | 41    |
| H18B | -76.22   | 5284.8   | 8428.67  | 41    |
| H19A | -2515.91 | 3336.14  | 4632.77  | 94    |
| H19B | -4053.79 | 3803.27  | 4447.34  | 94    |
| H20A | -3552.35 | 6190.82  | 4417.05  | 85    |
| H20B | -2141.7  | 5488.43  | 4230.4   | 85    |
| H21  | -981.74  | 6606.84  | 4881.94  | 79    |
| H22A | -3431.6  | 7775.13  | 5292.51  | 97    |
| H22B | -2747.16 | 8452.13  | 4771.94  | 97    |
| H23A | -1197.08 | 8244.34  | 5796.84  | 106   |
| H23B | -690.28  | 9124.52  | 5282.52  | 106   |
| H24A | -3015.78 | 9944.94  | 5885.23  | 109   |
| H24B | -2560.65 | 10804.57 | 5361.32  | 109   |
| H25A | -1817.9  | 12110.83 | 6147.55  | 59    |
| H25B | -522.8   | 11633.86 | 5808.74  | 59    |
| H27A | 733.37   | -965.99  | 10596.73 | 72    |
| H27B | 2363.67  | -1207.73 | 10566.78 | 72    |
| H28A | 2586.58  | 1205.82  | 10668.54 | 59    |

|      |         |         |          |    |
|------|---------|---------|----------|----|
| H28B | 966.97  | 1458.35 | 10586.09 | 59 |
| H29  | 1100.04 | 2042.65 | 9718.78  | 52 |
| H30A | 3851.08 | 2830.73 | 10049.79 | 55 |
| H30B | 2542.7  | 3797.61 | 10194.64 | 55 |
| H31A | 2139.59 | 4358.32 | 9265.31  | 51 |
| H31B | 3458.3  | 3397.56 | 9122.42  | 51 |
| H32A | 3636.12 | 6071.01 | 9761.12  | 49 |
| H32B | 4938.93 | 5133.6  | 9584.04  | 49 |
| H33A | 4706.98 | 7237.94 | 9034.52  | 43 |
| H33B | 3154.1  | 6795.75 | 8869.42  | 43 |
